# Supplementary material for: Measurement of 24-hour Continuous Human CH4 Release in a Whole Room Indirect Calorimeter
Source: bioRxiv or medRxiv preprint supplement (doi:10.1101/2022.11.04.22281777), 2022-11-30
Supplement: Supplementary file [file media-1.pdf]

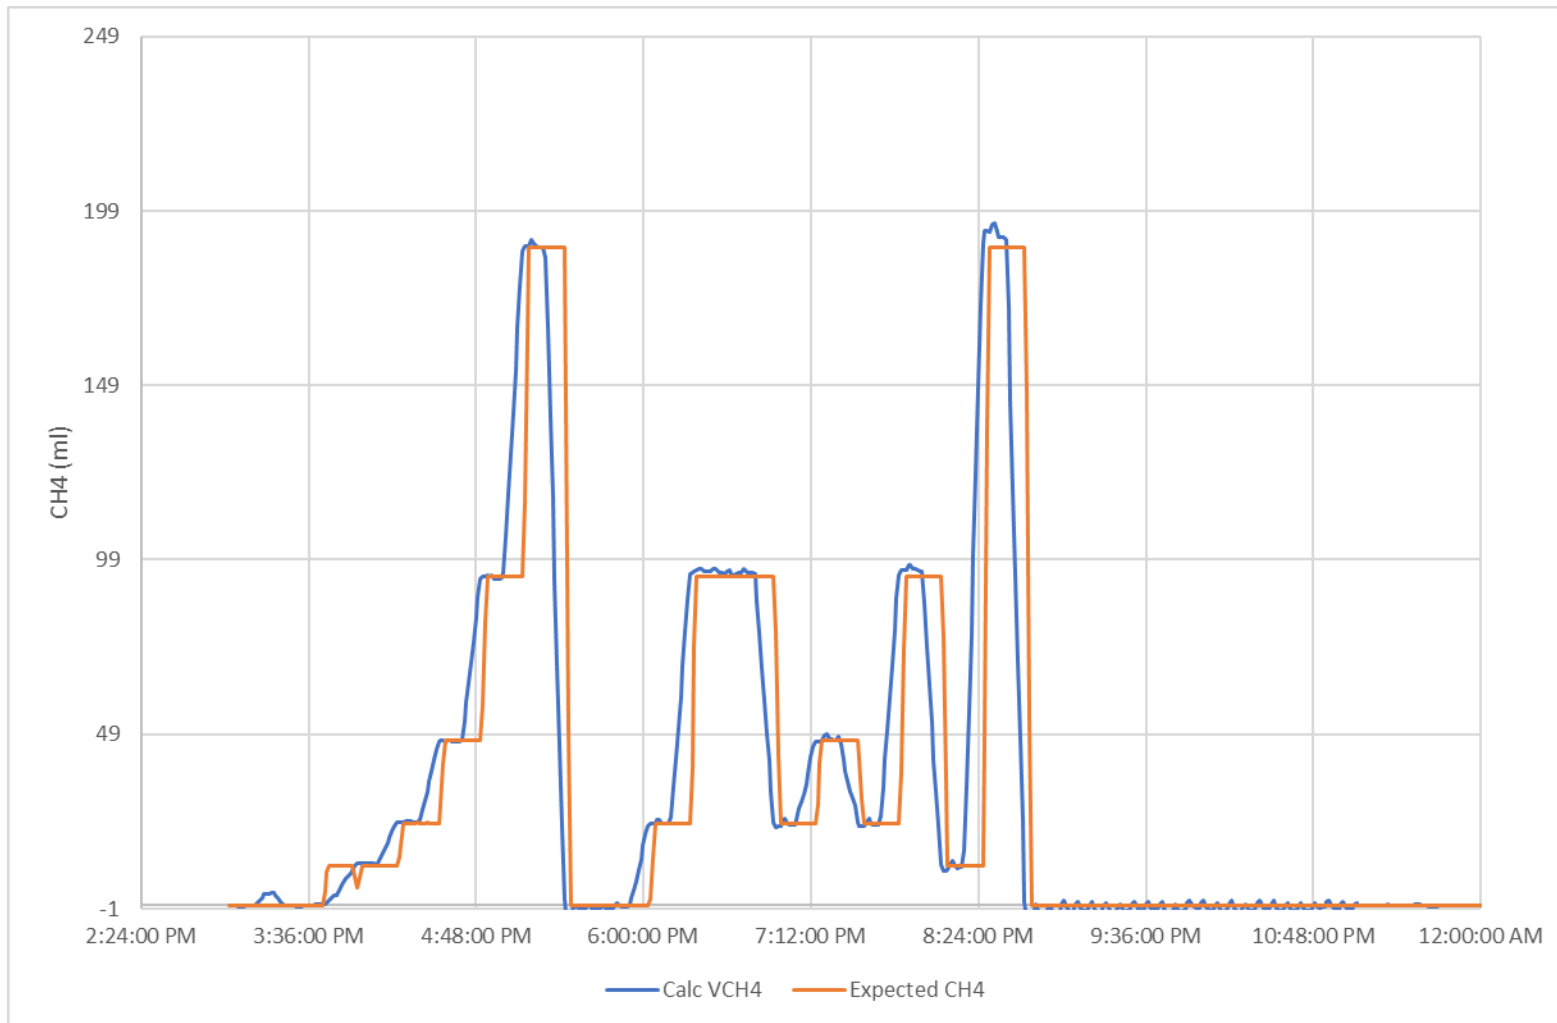

**Supplemental Figure 1.** Short step CH<sub>4</sub> infusion. First section of the graph shows time progression infusions (10 minutes/per step). Second section of the graph shows time random variable infusions (10 minutes per step).

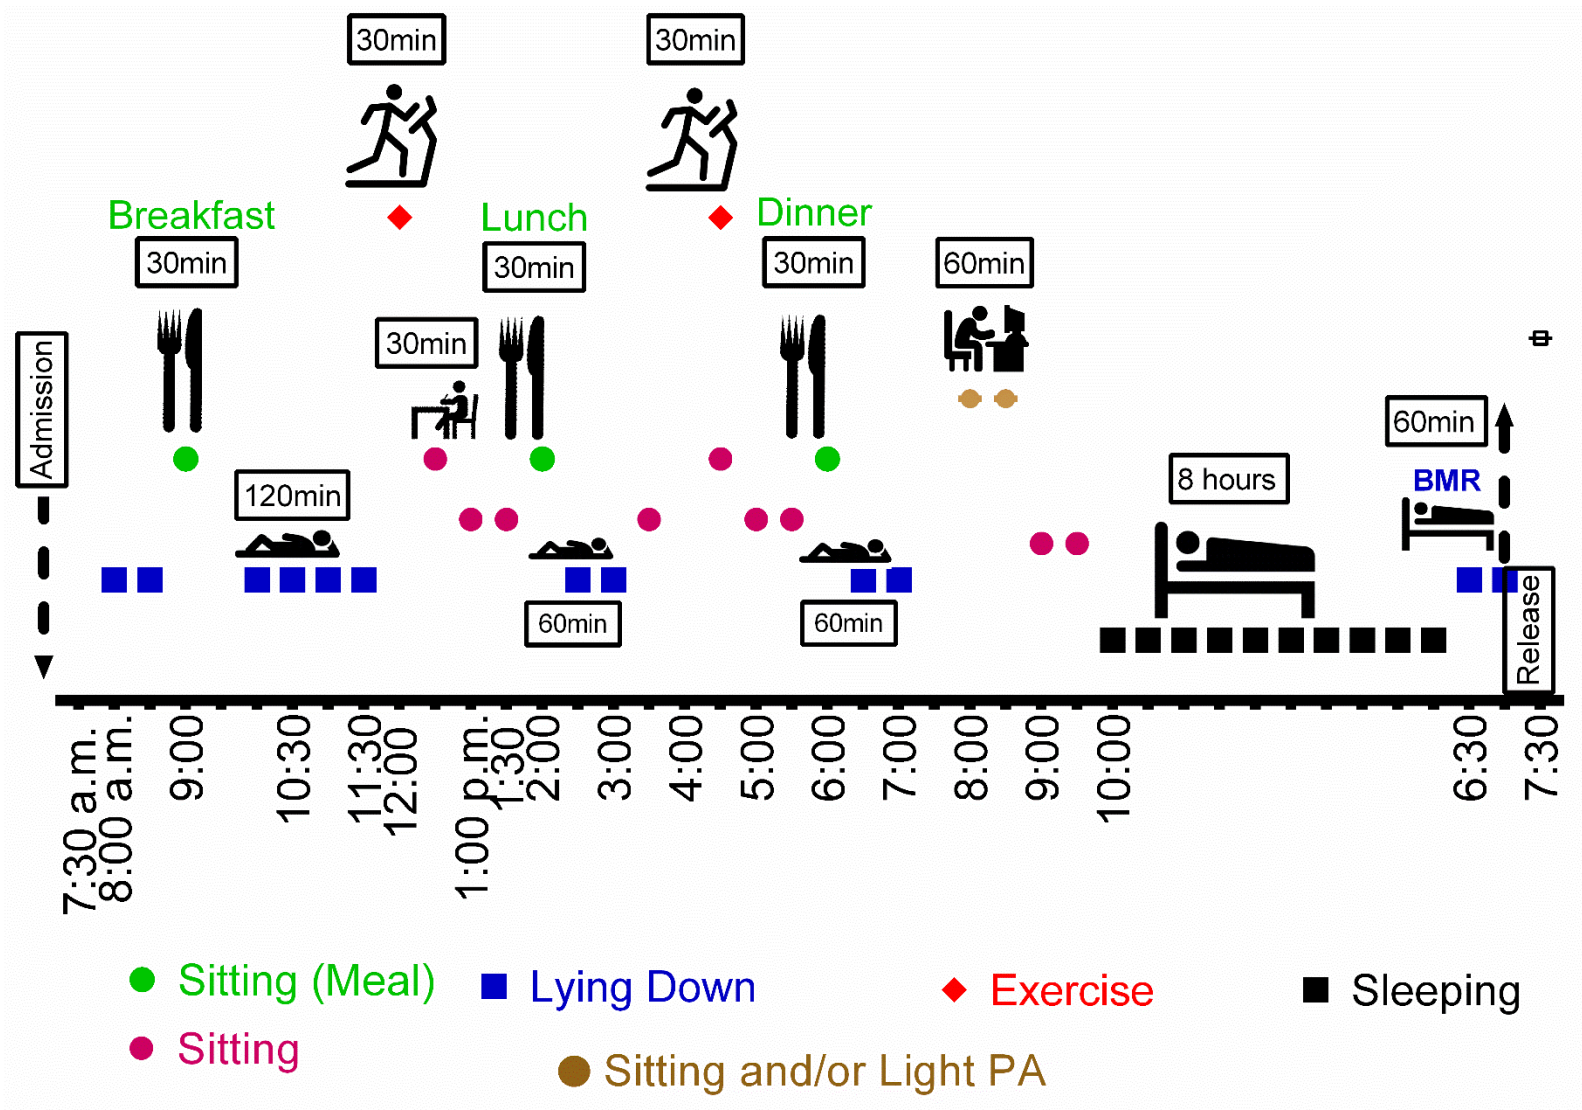

Supplemental Figure 2. Schedule of events inside the whole room indirect calorimeter (WRIC).

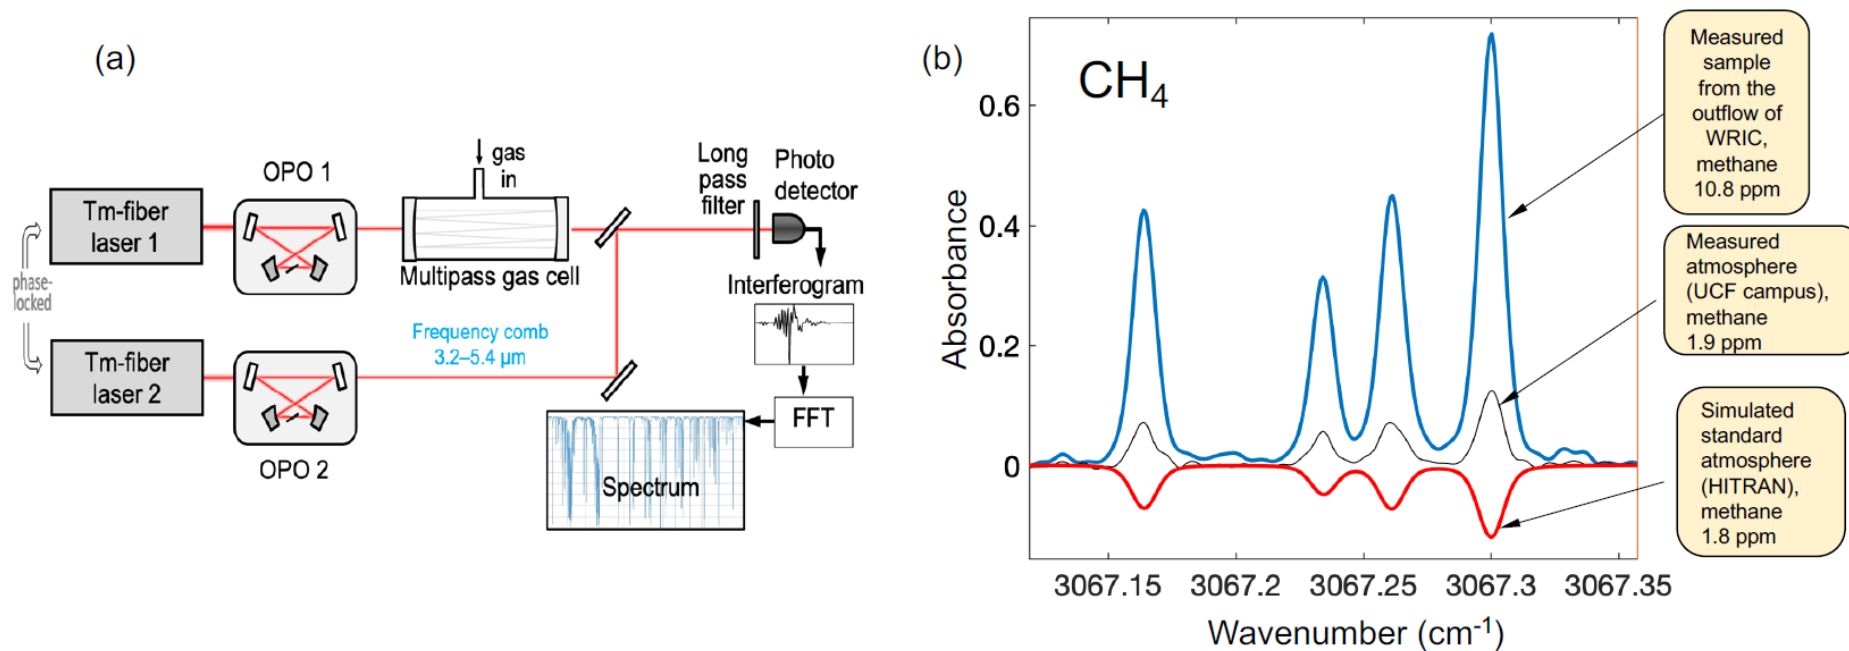

**Supplemental Figure 3.** (a) Schematic of the MIR DCS setup. A pair of phase-locked Tm-fiber lasers pump a pair of subharmonic OPOs. The two beams are combined, passed through a multipass gas cell with an equivalent path length of 76 m, and detected with a fast infrared detector. The detector signal is digitized, and fast Fourier transformed to retrieve the optical spectrum. (b) Measured and simulated absorption spectra of  $\text{CH}_4$ . Measured are examples of sample from whole room indirect calorimetry (WRIC) at the translational research institute (TRI) and University of Central Florida (UCF) A simulated spectrum (HITRAN) is inverted for clarity.
